# Supplementary material
Source: HighWire-hosted journal article supplement (https://bmjopen.bmj.com/content/13/5/e070641)
Supplement: inline-supplementary-material-1 [file inline-supplementary-material-1.pdf]

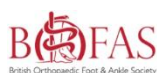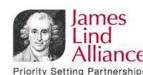

## Do you have any questions about foot & ankle conditions that could be answered by research?

We want new ideas for research for the treatment of foot & ankle conditions, which could help patients in the future. We want to hear from ANYONE with an interest in improving healthcare outcomes for patients being treated for foot and/or ankle conditions.

We are the Foot & Ankle Priority Setting Partnership; a collaboration between the British Orthopaedic Foot & Ankle Society and the James Lind Alliance, funded by BOFAS.

### PLEASE WRITE YOUR QUESTIONS HERE.

#### QUESTION 1

#### QUESTION 2

#### EXAMPLE QUESTIONS FROM OTHER REVIEWS:

SHOULD I HAVE MY BROKEN WRIST TREATED WITH SURGERY?

WHAT KIND OF SPINAL REHABILITATION IS BEST?

WHAT SORT OF HIP REPLACEMENTS ARE AVAILABLE?

HOW MUCH PHYSIOTHERAPY DOES MY FROZEN SHOULDER NEED?

WOULD AN INJECTION HELP MY SHOULDER PAIN?

#### Which of the following describes you?

- ☐ A patient who is waiting for, or has had foot and/or ankle procedure
- ☐ A carer, friend or family member of someone waiting for or has had foot and/or ankle procedure
- ☐ A healthcare professional
- ☐ Other \_\_\_\_\_

#### Healthcare professionals only; which best describes you?

- ☐ Orthopaedic Foot & Ankle Surgeon ☐ Trauma & Orthopaedic Surgeon
- ☐ GP ☐ Nurse
- ☐ Podiatrist ☐ Orthotist
- ☐ Surgical Podiatrist ☐ Physiotherapist
- ☐ Other \_\_\_\_\_

I am ☐ 18-29yrs ☐ 30-49yrs ☐ 50-69yrs ☐ 70+yr ☐ prefer not to say

#### Ethnic origin

- ☐ Asian/Asian British ☐ Black/African/Caribbean ☐ White
- ☐ Mixed/Multiple ethnic group ☐ Other ethnic group ☐ Prefer not to say

#### What best describes your gender?

- ☐ Female ☐ Male ☐ Prefer to self describe ☐ Prefer not to say

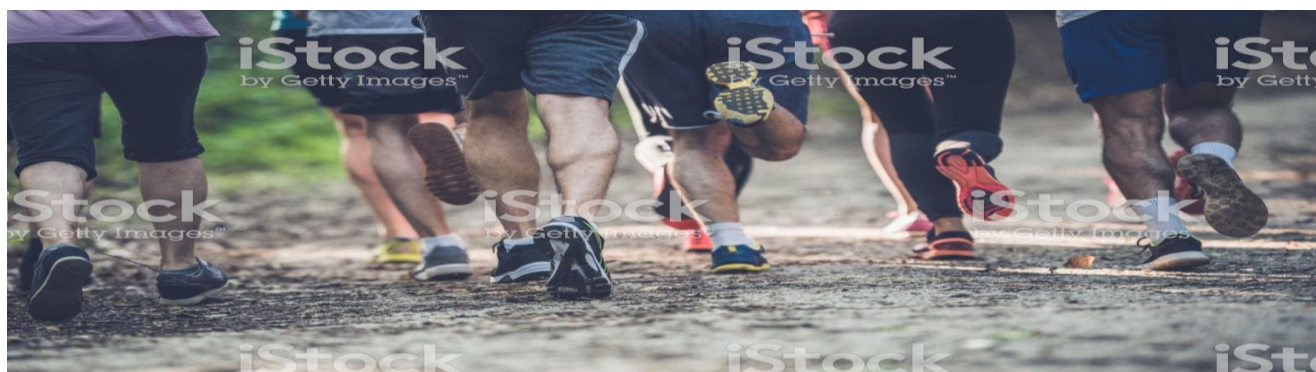

To find out more about this project or to take part online, go to [www.bofas.org.uk/JLA](http://www.bofas.org.uk/JLA)

When you have finished this survey please hand it in to reception.

Alternatively please complete the survey online [www.bofas.org.uk/JLA-survey](http://www.bofas.org.uk/JLA-survey)

Twitter .....  
Facebook.....

Email contact: [FootAnkleSurgeryPSP@bofas.org.uk](mailto:FootAnkleSurgeryPSP@bofas.org.uk)  
Telephone No: 07847 281130
